# Supplementary material for: Production of Marinated Chinese Lotus Root Slices Using High-Pressure Processing as an Alternative to Traditional Thermal-and-Soaking Procedure
Source: MDPI journal article supplement (doi:10.3390/molecules27196506), 2022-10-02
Supplement: s1 [file s1]

**Table S1.** Changes in color of HPP and TS marinated lotus root slices during storage

| Storage temperature (°C) | Storage time (days) | HPP            |               |                | TS            |              |                |
|--------------------------|---------------------|----------------|---------------|----------------|---------------|--------------|----------------|
|                          |                     | L*             | a*            | b*             | L*            | a*           | b*             |
| Blank                    | 0                   | 76.35±1.42     | -0.88±0.05    | 2.65±0.32      |               |              |                |
| 45                       | 0                   | 51.74±1.52b    | 7.58±0.57g    | 21.56±1.20bc   | 48.36±0.68c   | 8.48±0.43def | 23.95±0.74a    |
|                          | 2                   | 47.31±1.03cd   | 7.77±0.80fg   | 20.82±0.31cd   | 45.01±0.75e   | 8.71±0.20d   | 22.03±0.88b    |
|                          | 4                   | 46.99±0.38d    | 7.94±0.05efg  | 20.29±0.02de   | 44.52±0.39e   | 8.60±0.43de  | 20.79±0.26cd   |
|                          | 6                   | 46.63±0.31d    | 7.88±0.11efg  | 19.29±1.05ef   | 44.42±1.17e   | 8.82±0.33d   | 18.05±1.19gh   |
|                          | 9                   | 46.28±0.15d    | 8.63±0.72de   | 18.56±0.26fg   | 44.29±0.55e   | 9.98±0.44b   | 17.89±0.50gh   |
|                          | 12                  | 44.24±1.21e    | 9.08±0.46cd   | 18.24±0.69fgh  | 41.26±1.59f   | 10.08±0.78ab | 17.77±0.77gh   |
|                          | 15                  | 42.19±0.08f    | 8.38±0.21def  | 18.12±0.31fgh  | 39.27±0.68g   | 10.13±0.26ab | 17.33±1.37h    |
|                          | 18                  | 41.64±0.23f    | 9.64±0.42bc   | 17.27±0.21h    | 38.57±0.01g   | 10.72±0.33a  | 17.05±0.77h    |
| 25                       | 0                   | 51.74±1.52b    | 7.58±0.57e    | 21.56±1.20bc   | 48.36±0.68de  | 8.48±0.43cde | 23.95±0.74a    |
|                          | 4                   | 50.60±2.80bc   | 8.20±1.18cde  | 21.73±1.29bc   | 48.20±0.68de  | 8.55±0.30cde | 23.22±1.10a    |
|                          | 9                   | 48.85±1.00cd   | 7.80±0.37de   | 21.39±0.29bcd  | 46.67±0.98def | 8.54±0.37cde | 23.55±0.47a    |
|                          | 15                  | 47.02±0.77def  | 8.32±0.16cde  | 20.70±0.29bcde | 44.84±0.23fg  | 9.14±0.25c   | 21.38±1.00bcd  |
|                          | 25                  | 46.69±0.07def  | 8.75±1.00cd   | 20.36±0.24cdef | 42.89±2.50gh  | 7.69±0.37de  | 20.01±0.94defg |
|                          | 35                  | 46.06±0.93ef   | 8.42±1.34cde  | 19.19±1.09fgh  | 41.01±0.89hi  | 10.62±0.37b  | 21.85±1.23b    |
|                          | 45                  | 43.77±2.04g    | 8.63±0.88cde  | 18.95±1.04gh   | 40.63±1.49hi  | 11.23±0.48ab | 18.36±1.21h    |
|                          | 55                  | 41.23±0.10h    | 8.97±0.56c    | 18.02±1.41h    | 38.88±1.42i   | 11.71±0.45a  | 19.35±0.99efgh |
| 4                        | 0                   | 51.74±1.52b    | 7.58±0.57g    | 21.56±1.20bcd  | 48.36±0.68cde | 8.48±0.43fg  | 23.95±0.74a    |
|                          | 6                   | 50.46±1.43bc   | 7.46±0.80g    | 21.42±1.23bcd  | 48.23±0.30cde | 8.76±0.15ef  | 21.63±0.52bcd  |
|                          | 15                  | 49.13±0.64cd   | 8.32±1.10fg   | 20.56±0.96cde  | 46.40±0.45efg | 9.97±0.23cd  | 22.70±0.79ab   |
|                          | 25                  | 48.29±0.82cde  | 8.33±0.17fg   | 20.33±1.19def  | 45.63±0.51fgh | 9.95±0.33cd  | 22.23±1.20bc   |
|                          | 35                  | 48.46±4.21cde  | 8.80±0.41ef   | 20.18±2.70def  | 44.72±1.02ghi | 11.00±1.26ab | 23.80±0.96a    |
|                          | 45                  | 47.27±1.80def  | 8.47±0.28fg   | 19.69±0.63efg  | 43.73±0.90hij | 11.02±0.58ab | 22.07±0.75bc   |
|                          | 55                  | 45.94±3.28efgh | 9.17±0.02def  | 19.19±0.95efg  | 41.89±2.02jk  | 9.65±0.64de  | 20.63±0.81cde  |
|                          | 70                  | 42.82±2.23ijk  | 10.07±0.69bcd | 18.29±0.80gh   | 38.49±2.16l   | 11.20±0.81a  | 18.22±1.24gh   |
|                          | 80                  | 41.21±0.87k    | 10.87±0.64abc | 18.17±1.20gh   | 38.00±0.54l   | 11.02±0.12ab | 17.50±0.19h    |

Data are expressed as the mean standard deviation (n = 4). Different lowercase letters in the same column for each storage temperature indicate significant differences at  $p < 0.05$ . HPP, high pressure processing; TS, thermal-and-soaking.

**Table S2.** Reaction rate constant  $k$  and determination coefficient  $R^2$  for zero- and first- order regression of HPP-treated marinated lotus root slices at different temperatures

| Index      | Storage temperature (°C) | Zero-order regression |        |        | $\bar{R}^2$ | First-order regression |        |        | $\bar{R}^2$ |
|------------|--------------------------|-----------------------|--------|--------|-------------|------------------------|--------|--------|-------------|
|            |                          | $k$                   | $C_0$  | $R^2$  |             | $k$                    | $C_0$  | $R^2$  |             |
| Hardness   | 4                        | -102.27               | 13411  | 0.9779 | 0.9524      | -0.011                 | 13933  | 0.9939 | 0.9688      |
|            | 25                       | -129.85               | 13013  | 0.9497 |             | -0.014                 | 13352  | 0.9620 |             |
|            | 45                       | -428.78               | 13224  | 0.9295 |             | -0.047                 | 13683  | 0.9504 |             |
| TVC        | 4                        | 0.0407                | 1.3716 | 0.9475 | 0.9571      | 0.0138                 | 1.6117 | 0.9912 | 0.9900      |
|            | 25                       | 0.0601                | 1.6488 | 0.9837 |             | 0.0195                 | 1.8091 | 0.9862 |             |
|            | 45                       | 0.2002                | 1.2536 | 0.9401 |             | 0.0663                 | 1.5485 | 0.9925 |             |
| $\Delta E$ | 4                        | 0.0887                | 32.066 | 0.9258 | 0.9000      | 0.0025                 | 32.189 | 0.9367 | 0.9029      |
|            | 25                       | 0.1118                | 32.941 | 0.9122 |             | 0.0031                 | 32.992 | 0.9117 |             |
|            | 45                       | 0.3208                | 33.382 | 0.8610 |             | 0.0089                 | 33.421 | 0.8603 |             |
